# Supplementary material for: How to communicate and educate more effectively on natural risk issues to improve disaster risk management through serious games
Source: Copernicus journal article supplement (doi:10.5194/egusphere-2024-994), 2024-04-16

## DIMENSIONS

### ONLINE GAMES

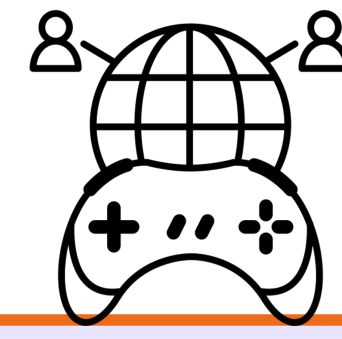

### MOBILE APPS

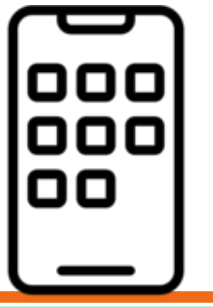

| Dimension                                                                                                                                   | Online Games                                                                                                                                                                                                                                                                                                                                   | Mobile Apps                                                                                                                                                                                                                                                                                                                                         |
|---------------------------------------------------------------------------------------------------------------------------------------------|------------------------------------------------------------------------------------------------------------------------------------------------------------------------------------------------------------------------------------------------------------------------------------------------------------------------------------------------|-----------------------------------------------------------------------------------------------------------------------------------------------------------------------------------------------------------------------------------------------------------------------------------------------------------------------------------------------------|
| <b>Identification</b><br><p>The games permit familiarisation with natural hazards, causes and effects/consequences arise</p>                | <ul style="list-style-type: none"> <li>Created by institutions</li> <li>English</li> </ul>                                                                                                                                                                                                                                                     | <ul style="list-style-type: none"> <li>Created by individuals</li> <li>Geostorm: 11 languages</li> </ul>                                                                                                                                                                                                                                            |
| <b>Gameplay</b><br><p>The games present mainly explorer players, which interact with the environment</p>                                    | <ul style="list-style-type: none"> <li>Individual and multi-player mode</li> <li>Positive feedbacks in Build a Kit</li> <li>Positive and negative feedbacks in Disaster Master</li> <li>Positive feedbacks in Stop Disaster</li> <li>Presence of rewards systems</li> <li>Short duration (1 hour)</li> <li>High-Medium interaction</li> </ul>  | <ul style="list-style-type: none"> <li>Individual mode</li> <li>Positive feedbacks</li> <li>No presence of rewards systems</li> <li>Long duration (more than 1 hour)</li> <li>High interaction</li> </ul>                                                                                                                                           |
| <b>Narrative</b><br><p>The games present varied narratives, scenarios and characters, connection between present and future is possible</p> | <ul style="list-style-type: none"> <li>Medium-High relevance of narrative</li> <li>Build a Kit character: girl in a wheelchair and her friends in familiar situations</li> <li>Disaster master character: same as Build a Kit in various scenarios</li> <li>Stop Disaster: no character, consists in creating buildings or defences</li> </ul> | <ul style="list-style-type: none"> <li>Low-Medium relevance of narrative</li> <li>Geostorm character: male and female adults as superheroes in space</li> <li>Earthquake relief rescue character: man and his dog in a city devastated by an earthquake</li> <li>Disaster Rescue Service character: rescuer in a city affected by floods</li> </ul> |
| <b>Content</b><br><p>The games use alarmist terms, do not provide information resources and do not present misconceptions or errors</p>     | <ul style="list-style-type: none"> <li>Basic images with soft and cheerful colours</li> <li>Build a Kit and Disaster Master, link to the government website</li> </ul>                                                                                                                                                                         | <ul style="list-style-type: none"> <li>Geostorm uses complex images with dark colours</li> <li>Geostorm link to trailer of the film</li> </ul>                                                                                                                                                                                                      |
| <b>Education</b><br><p>The games cover a broad spectrum of the cognitive levels of Bloom's Taxonomy and competences</p>                     | <ul style="list-style-type: none"> <li>Cover most competences and Bloom's Taxonomy and competences</li> <li>The Multiculturalism and Cultural Awareness and Expression Competences are addressed</li> <li>Medium-High difficulty</li> </ul>                                                                                                    | <ul style="list-style-type: none"> <li>Cover few competences</li> <li>Earthquake Relief Rescue and Disaster Rescue Service cover only the lowest cognitive levels of Bloom's Taxonomy</li> <li>Low-Medium difficulty</li> </ul>                                                                                                                     |

Online Game: Build a Kit, Disaster Master, Stop Disaster

Mobile Apps: Earthquake Relief Rescue, Disaster Rescue Service, Geostorm

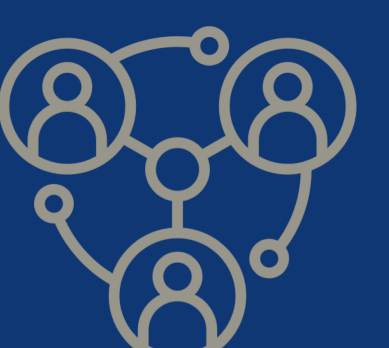

Supplement: Supplementary file [file egusphere-2024-994-AC1-supplement.pdf]
